# Supplementary material for: The clinicopathological characteristics, prognosis and immune microenvironment mapping in MSI-H/MMR-D endometrial carcinomas
Source: Discov Oncol. 2022 Mar 3;13:12. doi: 10.1007/s12672-022-00466-5 (PMC8894509; doi:10.1007/s12672-022-00466-5)
Supplement: Supplementary file 2 — Additional file2: Table 1. Upregulated genes in POLE and MSI groups compared with Other ECs. [file 12672_2022_466_MOESM2_ESM.xlsx]

## Sheet: POLE_MSI-up-regulated genes
	pvaue	p.adj
MCUB	4.87e-07	0.00923405
HOXA11	2.01e-11	3.82e-07
AP2B1	1.92e-13	3.63e-09
COX10	1.25e-08	0.000236572
ELAC2	3.24e-11	6.14e-07
ARSD	9.94e-08	0.00188404
PAX6	6.97e-10	1.32e-05
ADAM22	2.1e-06	0.0397511
MPND	2.33e-09	4.43e-05
MAPK8IP2	1.14e-07	0.00215874
TRAF3IP3	3.45e-11	6.55e-07
PHF7	1.93e-12	3.65e-08
FMO1	2.01e-12	3.81e-08
APBA3	3.63e-08	0.000687697
ABHD5	1.65e-14	3.13e-10
TTC19	8.77e-11	1.66e-06
PTBP1	2.11e-15	4e-11
ZBTB32	1.16e-09	2.2e-05
BRCA1	2.7e-10	5.12e-06
EXTL3	1.06e-06	0.0200217
UBR7	1.63e-14	3.09e-10
RNF14	3.05e-07	0.00577773
CD6	4.48e-07	0.00850296
COX15	5.06e-08	0.000960419
CHDH	2.19e-08	0.000414677
RNH1	1.2e-08	0.00022762
GLRX2	3.01e-07	0.00571537
NCAPH2	1.3e-11	2.46e-07
CD44	4.05e-08	0.000768404
SLAMF7	6.95e-10	1.32e-05
PRKCH	1.54e-07	0.00292094
RANBP3	1.81e-13	3.44e-09
MAP2K3	1.01e-12	1.92e-08
MYOM2	5.87e-08	0.00111316
PHLPP2	6.15e-08	0.00116629
RETSAT	3.57e-07	0.00677813
LCP2	6.85e-07	0.0129952
TNFRSF17	4.01e-09	7.6e-05
FAM120A	2.8e-19	5.31e-15
TNFRSF9	2.08e-06	0.0394484
FOXP3	8.58e-11	1.63e-06
HEXB	4e-09	7.58e-05
TNIP3	2.42e-06	0.045836
MAPK9	5.94e-07	0.0112589
BCAR1	2.48e-06	0.047005
RAD51	8.58e-08	0.00162715
PHPT1	1.49e-07	0.00283107
SOAT1	9.89e-11	1.88e-06
MSH4	1.5e-09	2.85e-05
ATP2C2	1.23e-06	0.0232398
SLC12A2	3.21e-07	0.0060783
CNN2	1.24e-10	2.36e-06
HMG20B	6.99e-13	1.32e-08
AP3D1	2.09e-20	3.96e-16
WDR18	3.27e-11	6.2e-07
ADAT1	2.19e-12	4.16e-08
MAP2K4	5.79e-07	0.0109704
CYB5R4	3.5e-08	0.000663063
COL17A1	6.14e-08	0.0011635
MSANTD3	5.52e-13	1.05e-08
PKM	2.66e-08	0.0005035
RHOA	3.24e-07	0.00614099
DHX8	2.23e-06	0.0423027
CBFB	2.08e-14	3.94e-10
PDK3	4.21e-07	0.00798555
COASY	2.21e-10	4.18e-06
PLEKHH3	2.54e-10	4.81e-06
PLA2G10	4.05e-07	0.00768542
MAPK6	4.26e-08	0.000807017
RAB27A	4.77e-09	9.04e-05
HDHD5	2.56e-08	0.000484656
RNF126	4.35e-12	8.25e-08
JMJD6	8.89e-08	0.0016866
CSNK2A2	3.04e-07	0.00576748
WDR1	4.11e-14	7.79e-10
TCF3	3.67e-11	6.96e-07
DAZAP1	3.96e-08	0.000750711
MBD3	1.64e-09	3.11e-05
SREBF1	2.26e-13	4.28e-09
SMC1A	1.71e-07	0.00324071
NFATC3	2.83e-07	0.00536547
ACAP1	6.93e-08	0.00131481
NLE1	6.18e-07	0.0117209
TBX21	2.35e-14	4.46e-10
NSF	2.26e-14	4.28e-10
MRPS34	8.49e-08	0.00160994
ATP2A3	4.56e-11	8.64e-07
HACD3	2.12e-07	0.00401841
ZZEF1	5.69e-08	0.00107953
ENO1	1.57e-06	0.0297604
TIPIN	8.74e-17	1.66e-12
GTSE1	7.34e-08	0.00139219
TTC38	5.59e-15	1.06e-10
ACAT1	2.62e-06	0.049734
ACTB	1.27e-11	2.41e-07
ARHGAP15	1.76e-06	0.0334503
ICAM3	8.11e-12	1.54e-07
SIRT6	1.07e-09	2.03e-05
CAPZB	3.05e-07	0.00577544
UBE2K	5.92e-07	0.0112198
TIGAR	3.7e-08	0.000702544
GNB1	4.61e-10	8.75e-06
HOXA9	6.97e-07	0.0132165
P2RY10	2.1e-10	3.98e-06
TP73	4.93e-10	9.34e-06
TOLLIP	4.26e-07	0.00807481
SP140	2.17e-10	4.11e-06
FDFT1	3.38e-15	6.42e-11
KCNN2	4.41e-13	8.36e-09
AP4E1	9.62e-12	1.82e-07
PTPRC	2.29e-06	0.0434817
ZNF510	1.84e-06	0.0348136
ME2	1.09e-06	0.0206423
ITGAE	6.35e-17	1.2e-12
OXCT1	7.53e-08	0.0014272
ZNF586	3.51e-07	0.00665969
TXLNA	9.05e-07	0.0171678
HSD17B2	8.04e-13	1.52e-08
ALG9	1.42e-08	0.000268345
LPCAT2	1.11e-07	0.00209975
OGFOD1	3.43e-07	0.00650008
SF3B2	3.33e-07	0.0063208
KHSRP	1.43e-15	2.71e-11
GNA11	4.68e-13	8.88e-09
COQ9	1.73e-07	0.00327939
SIRPG	3.16e-17	5.99e-13
GMIP	1.72e-08	0.00032532
LAG3	7.9e-15	1.5e-10
ANKRD24	4.17e-09	7.91e-05
SLC9A1	4.97e-07	0.00942618
LYZ	6.11e-08	0.00115833
GOLGA3	1.02e-09	1.94e-05
GLG1	1.42e-06	0.0268488
FH	1.45e-10	2.74e-06
ALKBH5	6.83e-12	1.3e-07
WDR76	1.03e-14	1.96e-10
CLSPN	1.33e-06	0.0251453
NUP50	1.11e-07	0.00210518
CDC45	1.87e-06	0.0353901
COMT	1.6e-06	0.0303092
CDC6	2.93e-11	5.55e-07
TMEM38B	1.16e-09	2.2e-05
NUP188	4.35e-22	8.25e-18
NANS	5.96e-08	0.00113033
IL12RB1	1.52e-12	2.88e-08
SCD	6.85e-12	1.3e-07
ATP5F1D	4.11e-09	7.8e-05
CBARP	2.55e-20	4.83e-16
TIMM13	1.62e-08	0.000306466
POLR2E	1.07e-16	2.03e-12
POLRMT	9.48e-08	0.0017983
CDHR5	1.24e-06	0.0234612
MKNK2	9.33e-23	1.77e-18
KLHL22	9.18e-08	0.00174135
MAPK1	2.07e-06	0.0391589
PRODH	2.67e-08	0.000506355
SLC25A1	6.62e-13	1.26e-08
PLA2G3	1.61e-07	0.00305202
LGALS1	1.73e-06	0.0328555
GCAT	1.45e-14	2.75e-10
CENPM	1.04e-12	1.97e-08
JOSD1	1.69e-08	0.000319601
FBXO7	3.41e-07	0.00646345
POLDIP3	2.19e-10	4.16e-06
PPP6R2	2.32e-06	0.044041
LMF2	2.87e-14	5.44e-10
RHBDD3	1.04e-08	0.00019697
PACSIN2	1.16e-11	2.21e-07
AP1B1	1.6e-09	3.03e-05
MCM5	6.14e-08	0.00116511
APOBEC3H	4.11e-08	0.000779536
TSPO	5.38e-10	1.02e-05
TTLL12	3.24e-08	0.00061454
TXN2	1.19e-11	2.26e-07
GRAP2	3.9e-09	7.39e-05
IL2RB	7.37e-10	1.4e-05
L3MBTL2	1.02e-09	1.93e-05
CHADL	2.89e-07	0.00547861
PHF5A	8.16e-09	0.000154742
POLR3H	7.81e-08	0.00148127
TRMU	8.26e-08	0.00156695
PMM1	1.04e-08	0.000196776
ZBED4	4.78e-07	0.00906663
HDAC10	1.76e-09	3.33e-05
GZMH	9.05e-13	1.72e-08
GZMB	1.01e-11	1.91e-07
GNPNAT1	1.45e-10	2.75e-06
KIAA0586	3.63e-10	6.87e-06
ITPK1	1.26e-06	0.0239602
MTHFD1	2.78e-10	5.27e-06
TCL1A	1.08e-06	0.0204565
GSKIP	2.22e-07	0.00420988
PCK2	1.37e-09	2.6e-05
PYGB	1.03e-09	1.94e-05
SLA2	1.02e-14	1.93e-10
SLCO4A1	1.01e-06	0.0191559
ADNP2	8.75e-08	0.00165954
PRPS2	1.32e-06	0.0250211
RBBP7	2.95e-07	0.00560306
TRADD	2.07e-08	0.000392033
CORO1A	1.12e-06	0.0212923
PHKB	3.72e-10	7.05e-06
NUTF2	3.37e-09	6.38e-05
CCL22	1.58e-09	3e-05
DHODH	1.5e-07	0.00285359
CTCF	1.11e-07	0.00210095
ACD	1.78e-14	3.38e-10
PARD6A	1.98e-27	3.76e-23
USB1	1.8e-09	3.42e-05
CYB5B	7.54e-09	0.000142903
PSMD7	2.47e-06	0.0468108
SLC38A7	3.73e-07	0.00706855
HAS3	1.4e-12	2.65e-08
TANGO6	5.55e-15	1.05e-10
SLC7A6OS	2.96e-08	0.000561084
FA2H	9.56e-11	1.81e-06
MON1B	1.28e-10	2.42e-06
CMC2	7.43e-09	0.000140935
MPG	1.41e-11	2.67e-07
RHBDL1	9.94e-08	0.00188481
HMOX2	4.3e-08	0.000814996
SALL1	1.79e-06	0.0340237
TOX3	1.33e-06	0.0252421
IL21R	3.19e-12	6.06e-08
AAGAB	1.08e-10	2.05e-06
LACTB	4.04e-07	0.00767017
CSK	4.43e-07	0.00840502
RAB11A	1.27e-06	0.0240198
VPS18	4.11e-11	7.79e-07
OIP5	2.66e-08	0.000504333
BLOC1S6	9.56e-07	0.0181193
TRIM35	9.02e-08	0.00170995
ERI1	4.24e-07	0.00804801
LEPROTL1	9.94e-07	0.0188497
R3HCC1	1.99e-07	0.00377423
GSR	1.71e-17	3.24e-13
KCTD9	9.24e-12	1.75e-07
FGL1	1.69e-06	0.0319882
BNIP3L	7.24e-09	0.000137209
ARHGEF18	1.04e-06	0.0197808
PEX11G	1.85e-08	0.000351727
DOT1L	7.04e-17	1.33e-12
PLEKHJ1	1.26e-10	2.4e-06
SF3A2	8.8e-09	0.000166846
AMH	9.42e-15	1.79e-10
OAZ1	9.5e-17	1.8e-12
TLE6	1.84e-18	3.49e-14
SGTA	3.3e-16	6.26e-12
SNAPC2	3.26e-14	6.18e-10
RASAL3	3.06e-08	0.000580513
GPI	1.93e-06	0.0366572
PIAS4	5.03e-11	9.54e-07
CACTIN	1.2e-10	2.27e-06
FZR1	3.93e-10	7.45e-06
BBC3	1.77e-12	3.36e-08
PLIN3	1.93e-08	0.000365706
CD79A	7.04e-11	1.34e-06
NKG7	9e-11	1.71e-06
MIER2	1.47e-06	0.0278348
LILRB5	1.61e-08	0.000305739
ETHE1	1.77e-06	0.0336104
DLX5	2.51e-07	0.00475233
ADAP1	9.53e-07	0.0180666
LFNG	1.06e-06	0.0200401
AGR2	1.45e-06	0.0274406
AMBP	6.82e-09	0.000129384
NPDC1	8.99e-08	0.00170507
CCSER2	4.13e-07	0.00784028
ACBD5	1.19e-06	0.0224917
P2RX1	2.07e-06	0.0393319
KPNB1	3.58e-08	0.000679026
PFN1	2.26e-16	4.29e-12
SLC25A11	1.37e-08	0.000260089
C1QBP	1.54e-11	2.92e-07
MED31	1.18e-09	2.24e-05
PEX12	1.3e-07	0.00246342
HSD17B1	1.63e-06	0.0309657
MLX	5.75e-16	1.09e-11
LRRC59	1.34e-11	2.53e-07
YWHAE	8.9e-09	0.000168794
NDUFC1	9.74e-10	1.85e-05
GRPEL1	4.62e-07	0.00876346
GALNT7	1.21e-06	0.0228775
TRIM2	5.6e-09	0.000106276
STIM2	9.87e-08	0.00187241
UFSP2	1.21e-06	0.0229729
UGDH	9.56e-07	0.0181312
MTCH2	6.93e-12	1.31e-07
CRTAM	4.56e-12	8.66e-08
HSPA8	2.27e-06	0.043046
DCPS	3.16e-08	0.000598892
CCND1	5.84e-08	0.001107
HPX	1.59e-07	0.00302001
TRIM3	4.75e-09	9.01e-05
PDHX	1.08e-10	2.05e-06
SCGB2A2	5.84e-10	1.11e-05
COQ5	3.34e-08	0.00063285
CORO1C	1.54e-11	2.92e-07
CYP27B1	1.77e-11	3.36e-07
IFNG	3.27e-21	6.2e-17
GAPDH	1.02e-10	1.94e-06
TPI1	1.38e-14	2.61e-10
ENO2	8.12e-08	0.00154039
ULBP1	3.82e-11	7.25e-07
PEX7	3.98e-07	0.00755232
PPP2R5D	2.77e-07	0.00524572
DAP	9.12e-07	0.0172867
MRPS27	4.31e-10	8.18e-06
GZMK	7e-10	1.33e-05
ITK	7.82e-14	1.48e-09
LMNB1	1.29e-06	0.0244025
GNPDA1	7.64e-12	1.45e-07
ERGIC1	2.06e-07	0.00390704
GBE1	9.31e-12	1.77e-07
KLHL18	9.38e-08	0.00177781
IL1A	2.45e-10	4.65e-06
REEP6	4.11e-11	7.79e-07
PCSK4	1e-06	0.0190046
RPS15	1.51e-09	2.86e-05
NDUFS7	2.28e-11	4.33e-07
DOK1	6.81e-07	0.0129098
SDC1	1.25e-06	0.0237844
KISS1R	5.2e-24	9.85e-20
WRAP73	1.5e-06	0.0285124
ICMT	2.82e-09	5.35e-05
KIAA1324	4.71e-07	0.00893579
FBXO6	1.76e-06	0.0333069
CD2	1.22e-11	2.32e-07
SLAMF1	7.67e-11	1.45e-06
AKR1A1	1.22e-07	0.00230587
PIK3R3	6.57e-11	1.25e-06
FASLG	2.11e-11	3.99e-07
HSD11B1	3.84e-09	7.29e-05
RPS6KA1	7.59e-11	1.44e-06
MESD	8.63e-09	0.000163641
MUC5B	2.7e-08	0.000511897
STK11	4.63e-10	8.78e-06
TREH	8.29e-08	0.00157199
EEF2KMT	2.52e-10	4.78e-06
TRPM6	2.66e-07	0.00504939
RAD23B	2e-07	0.00378717
FKBP15	6.4e-08	0.00121446
CTNNAL1	7.98e-10	1.51e-05
WDR34	6.78e-10	1.29e-05
PTPA	1.26e-07	0.00238858
GLE1	1.63e-15	3.1e-11
FBXW2	1.04e-07	0.00196787
NEK6	1.21e-12	2.29e-08
PPP6C	7.1e-11	1.35e-06
RBM18	1.1e-06	0.0209254
HSDL2	3.58e-09	6.79e-05
GALNT12	1.03e-08	0.000194474
ALG2	5.51e-07	0.0104563
C19orf25	1.91e-12	3.62e-08
GPR68	4.8e-11	9.1e-07
CD274	4.59e-08	0.000871153
DUSP4	6.3e-11	1.2e-06
TNFRSF10B	5.22e-12	9.91e-08
PPP3CC	1.02e-10	1.93e-06
MND1	9.22e-09	0.000174744
CD80	2.15e-08	0.00040845
CCRL2	1.07e-08	0.000203503
CCR2	5.39e-08	0.00102228
POLR3GL	1.78e-07	0.00337667
SASH3	5.34e-07	0.0101265
LAX1	5.59e-13	1.06e-08
CD244	1.12e-08	0.000211603
LY9	2.11e-08	0.000400873
ACO1	1.32e-08	0.000249777
CHST3	1.23e-08	0.000232516
ACADS	1.46e-12	2.77e-08
SPRYD7	8.87e-11	1.68e-06
ARHGAP9	4.17e-09	7.9e-05
HOXC11	2.81e-11	5.33e-07
ZNF831	3.01e-11	5.71e-07
IL9R	2.21e-13	4.18e-09
SPDEF	8.06e-09	0.000152761
CDKN1A	9.82e-13	1.86e-08
NRN1	3.62e-08	0.000686656
GOT2	3.81e-21	7.22e-17
SRMS	7.3e-09	0.000138497
PSPN	1.4e-10	2.66e-06
GTF2F1	1.99e-10	3.77e-06
CLPP	1.83e-16	3.47e-12
TNFSF9	2.04e-19	3.86e-15
CD70	1.38e-06	0.0261248
SDCBP2	2.09e-09	3.97e-05
FOXA2	8.27e-10	1.57e-05
NKX2-2	7.55e-08	0.0014315
BMP2	4.91e-07	0.0093046
S1PR4	1.88e-12	3.56e-08
NCLN	2.53e-23	4.8e-19
HCST	9.92e-07	0.0188169
WNK4	6.39e-08	0.00121101
BCL11B	1.25e-09	2.36e-05
UQCR11	1.64e-09	3.12e-05
KDM4B	3.35e-12	6.35e-08
EMC6	8.8e-07	0.0166895
METTL16	2.2e-06	0.0417011
ASPHD2	6.01e-07	0.0113952
YWHAH	4.1e-07	0.00777821
BAIAP2L2	7e-07	0.0132768
GALR3	1.75e-07	0.00331845
MYO5C	3.1e-07	0.00587832
ELL3	1.02e-09	1.94e-05
IVD	4.38e-07	0.0082988
CLN6	6.07e-12	1.15e-07
ARPP19	4.06e-07	0.00770652
CALML4	3.42e-07	0.00649254
DCTD	1.38e-07	0.00261288
TXNDC17	6.66e-11	1.26e-06
FXR2	2e-06	0.0378691
KIF1C	6.63e-09	0.000125652
MPDU1	2.02e-12	3.83e-08
MTUS1	6.78e-07	0.0128527
TEP1	2.85e-08	0.000540023
REEP5	2.39e-06	0.045343
TTI2	4.55e-12	8.63e-08
DOHH	7.43e-09	0.000140822
ABHD17A	6.96e-07	0.0131937
GAMT	4.28e-17	8.11e-13
LDLR	4.57e-07	0.00867343
FAM98C	2.13e-07	0.00404334
ATP8B3	2.33e-14	4.41e-10
LSM7	6.47e-09	0.000122703
RTN4IP1	7.04e-07	0.0133582
GDF15	3.26e-09	6.17e-05
TRPM4	1.78e-06	0.03367
ZNF557	1.29e-06	0.0244612
ATXN10	2.73e-07	0.00518143
MNX1	1.12e-20	2.12e-16
PRDM12	2.36e-07	0.00447681
UCK1	2.93e-09	5.56e-05
SESN2	2.83e-08	0.000537081
ATP5IF1	9.84e-07	0.0186511
MED18	1.05e-07	0.00199951
ANGPTL6	2.8e-07	0.00530735
PKDREJ	5.47e-07	0.0103676
ULBP2	1.96e-14	3.72e-10
COX4I1	1.8e-07	0.00340717
EMC8	2.72e-11	5.15e-07
GINS2	1.53e-15	2.9e-11
CHMP1A	2.92e-08	0.000553558
F12	5.13e-07	0.00973015
SLC6A6	4.34e-07	0.00822289
TUBG1	4.77e-23	9.05e-19
PSME3	1.58e-07	0.00300371
PSMC3IP	2.32e-11	4.4e-07
ACLY	3.49e-16	6.62e-12
VPS25	6.42e-09	0.000121675
AOC2	2.15e-12	4.08e-08
DIAPH1	1.24e-07	0.00235805
FMO5	7.86e-08	0.00149077
GCH1	6.21e-10	1.18e-05
FCRLA	9.6e-09	0.000182028
ARFIP2	3.79e-08	0.000717812
RPA1	1.17e-09	2.22e-05
UBE2G1	1.69e-06	0.0320528
EIF5A	8.09e-10	1.53e-05
VPS4A	2.08e-08	0.000395233
PCNA	2.88e-08	0.000547055
SCO1	1.17e-13	2.21e-09
BTBD2	7.93e-09	0.000150344
CSNK1G2	4.26e-08	0.000808723
EIF2S1	5.11e-08	0.000968587
EDEM1	5.07e-07	0.0096216
PTPN22	5.84e-08	0.00110804
CD101	1.3e-11	2.46e-07
TMEM106C	4.42e-07	0.00838879
LDHA	6.12e-12	1.16e-07
IL2RA	4.75e-08	0.000901118
KLRD1	1.34e-12	2.53e-08
DDB2	5.37e-20	1.02e-15
FADS2	5.12e-09	9.71e-05
TCN1	2.93e-08	0.000554768
GGACT	7.52e-10	1.43e-05
STT3A	1.83e-06	0.0347468
OSTF1	5.62e-13	1.06e-08
UBQLN1	9.23e-09	0.000175075
NAA35	6.36e-09	0.000120594
C9orf40	1.99e-10	3.77e-06
ANXA1	1.58e-12	3e-08
HNF1A	1.28e-06	0.0242436
HILPDA	1.97e-06	0.0373491
NT5E	6.39e-10	1.21e-05
TESPA1	2.36e-07	0.00446931
AGAP2	5.68e-09	0.000107656
MPHOSPH6	4.01e-09	7.61e-05
FBXL8	1.27e-14	2.41e-10
NIPSNAP3A	1.01e-07	0.00192324
TOR1B	2.16e-06	0.0409684
TOR1A	1.03e-06	0.019446
SLC31A1	2.36e-07	0.0044732
MRPL50	1.63e-07	0.00309734
DPM2	1.04e-06	0.0197403
TRMO	1.87e-07	0.00354838
GOLGA1	7.75e-13	1.47e-08
NCBP1	1.93e-07	0.00366586
SIT1	9.97e-15	1.89e-10
GRHPR	5.09e-10	9.66e-06
IRF4	3.77e-12	7.15e-08
TCF19	4.87e-08	0.000924038
FGFBP2	2.5e-06	0.047349
IL18BP	4.02e-08	0.000761821
PPP2R1B	1.42e-08	0.000268514
SQOR	9.15e-13	1.73e-08
NDUFAF1	5.14e-14	9.75e-10
KNL1	1.87e-06	0.0354888
HAUS2	7.67e-14	1.45e-09
RTF1	5.61e-09	0.000106432
TUBGCP4	7.47e-15	1.42e-10
RMDN3	3.57e-09	6.78e-05
TMEM62	7.94e-14	1.51e-09
GCHFR	2.1e-16	3.99e-12
MFSD13A	2.04e-06	0.0386301
STAT4	1.47e-07	0.00279309
IDH1	1.27e-11	2.41e-07
TMOD3	7.05e-09	0.000133651
PARP16	3.11e-13	5.9e-09
FAM13A	9.75e-07	0.0184805
HERC3	5.01e-07	0.00950977
GPAT3	6.24e-07	0.0118314
IL21	3.98e-17	7.55e-13
CXCL9	2.3e-23	4.35e-19
PPA2	7.69e-07	0.014586
HADH	7.39e-10	1.4e-05
PARVG	1.34e-11	2.54e-07
B4GALNT3	4.04e-07	0.00766192
CD27	5.87e-12	1.11e-07
AMIGO2	1.78e-09	3.37e-05
POC1B	1e-06	0.0190439
MTMR6	7.99e-07	0.0151607
ITGB7	7.69e-07	0.0145756
MFAP1	1.16e-06	0.0220632
LYSMD2	2.63e-07	0.00499054
SLC27A2	1.41e-09	2.67e-05
COMMD4	1.31e-06	0.0248818
PSTPIP1	9.42e-07	0.0178618
ETFA	1.62e-13	3.08e-09
BCL2A1	1.77e-06	0.0336573
ARRDC4	1.71e-06	0.0325208
FANCI	5.22e-08	0.000990143
EFL1	1.04e-08	0.000196495
DHX38	1.06e-06	0.020099
NUDT7	1.15e-07	0.00218788
NOL3	2.52e-12	4.79e-08
MAP1LC3B	1.37e-08	0.000260031
OSGIN1	2.66e-12	5.05e-08
NDUFB10	6.46e-08	0.00122579
TCF25	5.61e-07	0.0106384
NCOR1	9.37e-08	0.0017764
COPS3	8.55e-12	1.62e-07
GID4	4.05e-07	0.0076707
UTP4	5.45e-09	0.000103398
VPS53	2.99e-10	5.67e-06
SAT2	9.9e-11	1.88e-06
ELAC1	9.02e-07	0.0171055
RETREG3	4.32e-08	0.000818329
SLC39A3	2.3e-09	4.36e-05
FEM1A	6.38e-09	0.000121075
SH3GL1	3.21e-17	6.09e-13
DUS3L	3.87e-09	7.35e-05
DPP9	1.47e-08	0.000278742
TRPM2	2.05e-07	0.00387997
PSMB6	1.25e-07	0.00237216
DMRTA2	7.62e-08	0.00144425
SYTL1	3.05e-10	5.79e-06
CELA3A	2.73e-11	5.17e-07
ALDH9A1	2.74e-07	0.00520149
FCRL5	9.11e-10	1.73e-05
OAZ3	2.92e-09	5.53e-05
DTL	1.54e-07	0.00292127
PTPN7	3.47e-11	6.59e-07
MALL	2.21e-06	0.0419934
FBLN7	1.2e-06	0.0226967
LYG1	1.05e-11	1.99e-07
LNPK	2.72e-09	5.15e-05
ZNF385B	1.8e-08	0.000340868
CDCA7	2.06e-07	0.0039156
GULP1	2.57e-06	0.0487192
CTDSPL	5.68e-09	0.000107683
ARL6IP5	1.3e-06	0.0245904
LIMD1	6.41e-09	0.000121618
EAF2	2.34e-09	4.44e-05
OCIAD2	6.9e-07	0.013081
ENOPH1	1.15e-16	2.18e-12
GZMA	4.44e-08	0.000842389
KCNMB1	1.97e-06	0.0373632
DOK3	1.31e-06	0.0249316
GPR174	2.89e-09	5.48e-05
IL2RG	2.35e-06	0.0446118
MCPH1	6.14e-09	0.000116395
ATP6V1B2	5.47e-08	0.0010382
CCDC25	1e-06	0.0190309
DOK2	1.52e-08	0.000289025
CHMP7	7.54e-12	1.43e-07
DOCK5	1.6e-06	0.0302965
SIGMAR1	1.2e-07	0.00228154
CEP78	9.23e-08	0.00174964
IDNK	5.66e-14	1.07e-09
ALAD	9.06e-07	0.0171822
POLE3	8.68e-09	0.000164559
SURF4	6.69e-14	1.27e-09
SURF1	8.03e-07	0.0152242
RPL7A	1.73e-06	0.0328025
NTMT1	1.52e-07	0.00287806
SEC16A	1.44e-14	2.73e-10
RGR	1.66e-08	0.000314052
ADM	5.16e-15	9.78e-11
LAMTOR1	1.11e-06	0.0211008
TKFC	2.05e-08	0.000389587
MTA2	3.13e-11	5.94e-07
EI24	2.23e-08	0.000422696
ALDOA	6.35e-08	0.00120468
TIRAP	1.39e-20	2.63e-16
DLAT	9.63e-07	0.0182691
PRSS53	3.01e-07	0.00570191
SLC7A11	1.85e-06	0.0350572
NOCT	7.23e-10	1.37e-05
KCTD14	2.56e-07	0.00486205
VPS26B	7.98e-12	1.51e-07
NCAPD3	1.47e-07	0.00278598
SLC25A4	4.5e-11	8.54e-07
AP1S3	1.53e-09	2.9e-05
FAM151B	3.97e-11	7.52e-07
TRIM36	1.29e-13	2.44e-09
SAR1B	1.56e-07	0.00295536
ANKRD22	9.24e-07	0.0175189
PRDM8	1.06e-06	0.0200812
JAKMIP1	1.94e-15	3.68e-11
NR4A2	1.84e-07	0.00348743
CD96	4.85e-08	0.000919854
NMRAL1	1.69e-06	0.032122
CD8A	3.24e-16	6.15e-12
ZDHHC7	2.14e-07	0.0040486
DDAH1	1.12e-16	2.12e-12
GBP5	8.98e-12	1.7e-07
BUB3	7.23e-08	0.00137045
FLCN	1.79e-06	0.0339675
SKA1	6.04e-07	0.0114589
HEATR3	1.98e-06	0.037543
SLA	2.95e-07	0.0055854
VPS37A	5.86e-07	0.0111112
GNA14	4.97e-07	0.00943323
WHAMM	1.91e-16	3.62e-12
CXCL13	2.39e-20	4.54e-16
MS4A1	1.36e-07	0.00258717
NTAN1	1.25e-07	0.00236959
TMED6	2.07e-08	0.000392444
VPS26C	2.58e-07	0.00488505
CREB3L1	2.12e-07	0.00401129
TMEM268	2.13e-08	0.000404633
FANCC	9.01e-07	0.0170892
ZC3H18	1.65e-09	3.13e-05
PFKFB1	6.9e-08	0.00130899
PKD1L1	9.79e-08	0.00185656
SLAMF8	1.51e-06	0.0286254
RNF166	6.35e-10	1.2e-05
SPATA2L	1.61e-10	3.05e-06
NPM2	1.2e-08	0.000228489
FBXW5	4.14e-07	0.00785828
CHAF1B	1.55e-10	2.94e-06
HK2	1.3e-06	0.024688
UBR1	1.73e-06	0.0327434
RGL4	1.63e-07	0.00309602
RSPRY1	7.49e-12	1.42e-07
NAE1	3.31e-08	0.000627759
ADGRG5	4.53e-10	8.59e-06
ATP6V0D1	1.68e-09	3.18e-05
ABR	6.79e-09	0.000128722
LYPD5	6.79e-09	0.000128799
CCDC117	5.57e-07	0.0105575
CCDC107	1.83e-06	0.0347846
ZNF221	4.68e-07	0.0088766
CALM3	1.81e-06	0.0342582
TFF3	1.83e-10	3.47e-06
TFF1	8.68e-10	1.65e-05
UBASH3A	5.23e-11	9.91e-07
CLDND2	2.72e-10	5.16e-06
PKN3	5.93e-11	1.12e-06
CD3G	2.61e-14	4.95e-10
CXCR5	2.48e-06	0.0470162
NLRX1	2.21e-08	0.000418189
CCR5	2.01e-09	3.82e-05
FCRL3	5.27e-13	1e-08
MFSD12	8.48e-07	0.0160815
CCDC116	1.14e-11	2.16e-07
FDXR	2.32e-12	4.4e-08
CYGB	4.58e-07	0.00869285
SIGLEC11	2.5e-06	0.0474732
MED11	1.26e-10	2.4e-06
SCIMP	4.16e-09	7.89e-05
RNASEK-C17orf49	4.3e-10	8.15e-06
SNRNP25	8.69e-12	1.65e-07
PAQR4	3.86e-10	7.33e-06
ZG16B	9.18e-07	0.0174043
SLC25A45	9.95e-16	1.89e-11
CMPK1	8.58e-07	0.0162718
SELENON	2.68e-13	5.08e-09
GFI1	1.8e-16	3.41e-12
SLAMF6	6.97e-12	1.32e-07
PKDCC	7.37e-12	1.4e-07
FCMR	2.18e-09	4.14e-05
SGCB	1.59e-06	0.0302228
MSX1	1.26e-07	0.00238661
LMOD3	1.79e-06	0.0339687
EOMES	1.51e-12	2.85e-08
TRAT1	5.41e-11	1.03e-06
PYHIN1	1.43e-13	2.71e-09
RPL22L1	4.9e-17	9.29e-13
CTLA4	1.32e-11	2.51e-07
ICOS	1.27e-17	2.41e-13
COX18	5.72e-13	1.08e-08
UCN	2.45e-13	4.64e-09
S100P	1.3e-08	0.000245744
METAP1	1.14e-06	0.0215316
HSPA4L	7.46e-08	0.00141375
MST1R	7.32e-10	1.39e-05
TEX264	1.14e-06	0.021655
GRM2	3.53e-07	0.00668681
PPM1M	9.98e-10	1.89e-05
C4orf3	2.42e-09	4.58e-05
SAP30	3.55e-13	6.73e-09
ANXA5	1.16e-07	0.0022004
TMEM144	5.09e-11	9.66e-07
HHIP	1.55e-08	0.00029378
CASP3	2.26e-08	0.00042835
UQCRQ	1.52e-07	0.002876
SFXN1	1.09e-13	2.06e-09
GALNT10	5.31e-13	1.01e-08
RELL2	1.22e-06	0.0231938
HNF4G	2.22e-08	0.000420413
EN2	2.94e-12	5.57e-08
NUDT2	9.3e-07	0.0176277
FXN	8.6e-10	1.63e-05
C9orf64	7.9e-08	0.00149719
ZNF367	2.08e-08	0.000393842
VCP	7.85e-07	0.0148823
CRYL1	9.72e-09	0.000184266
PDZD8	2.36e-07	0.0044709
PMPCA	3.57e-08	0.000677154
ENTR1	6.88e-07	0.0130515
GPT2	4.83e-14	9.16e-10
CENPN	5.84e-09	0.000110682
AKIP1	1.76e-20	3.34e-16
ATMIN	9.29e-08	0.00176096
LEO1	1.71e-11	3.24e-07
TK2	5.1e-08	0.000967245
AP1G1	6.48e-07	0.0122968
PCLAF	6.71e-09	0.000127204
LDHD	1.18e-07	0.00223607
MRPL16	3.89e-07	0.00738158
DIS3L	1.09e-10	2.07e-06
MEI1	2.74e-08	0.000518892
SLC27A4	1.56e-10	2.96e-06
DOLPP1	1.68e-15	3.19e-11
ENDOG	5.39e-09	0.000102151
FBXO22	1.09e-11	2.07e-07
SNX20	1.53e-06	0.028955
DUS2	8.1e-09	0.000153678
CD3D	1.37e-13	2.59e-09
STIM1	1.44e-06	0.0272841
RRM1	1.62e-13	3.06e-09
OR51E2	4.87e-08	0.000922586
FN3K	9.47e-08	0.0017967
GPX4	1.37e-13	2.6e-09
JSRP1	8.14e-15	1.54e-10
MVD	5.56e-14	1.05e-09
CDT1	1.02e-15	1.93e-11
TRAPPC2L	2.41e-08	0.000456234
ANKRD11	1.49e-06	0.02833
RPL13	8.96e-07	0.0169852
DHRS13	1.09e-07	0.00206317
TP53I13	2.44e-09	4.63e-05
LAIR2	5.75e-08	0.00109059
DAPK3	2.38e-11	4.51e-07
EEF2	7.01e-08	0.00132977
CHAF1A	2.48e-18	4.71e-14
UBXN6	2.38e-11	4.51e-07
GLOD4	2.85e-10	5.4e-06
SRR	1.81e-18	3.43e-14
TSR1	1.28e-08	0.000242793
ANGPTL4	4.19e-07	0.00795407
ZNF232	2.21e-08	0.000419195
RAB26	4.85e-08	0.000919627
ZNF597	2.5e-06	0.047494
NLRC3	1.81e-09	3.42e-05
FTH1	1.37e-06	0.0260103
PBK	2.42e-07	0.00458342
DDIT4	1.07e-07	0.00202875
ZCCHC4	1.98e-06	0.0376167
THAP11	5.53e-09	0.000104908
XIRP1	4.1e-13	7.77e-09
DTYMK	9.39e-07	0.0178135
MLKL	1.28e-06	0.0242809
RFWD3	1.27e-08	0.000241437
RHOH	7.39e-12	1.4e-07
FEN1	7.58e-09	0.000143722
HEXIM2	7.07e-12	1.34e-07
ADAM9	1.12e-08	0.0002125
ABHD15	4.74e-11	9e-07
DDX19A	9.78e-07	0.0185511
MAP2K1	4.52e-08	0.00085667
DHRSX	6.36e-10	1.21e-05
PCSK9	9.21e-15	1.75e-10
CA5B	1.28e-06	0.0243438
CXCL11	4.28e-07	0.00810976
CRADD	8.49e-08	0.00160906
PTPN9	2.23e-06	0.0422385
RASSF6	1.43e-12	2.7e-08
HINT1	1.12e-11	2.12e-07
DFFB	1.87e-06	0.0355542
ONECUT1	2.92e-16	5.53e-12
SYAP1	1.92e-07	0.00365029
NIPA1	5.12e-16	9.72e-12
FOXD4	2.42e-06	0.0459718
GPR25	2.73e-11	5.18e-07
ADPRM	1.37e-08	0.000260345
ELP5	4.44e-07	0.00842214
ADORA2B	2.49e-12	4.73e-08
MZB1	6.37e-08	0.00120873
TRABD	6.38e-13	1.21e-08
POLH	9.1e-07	0.0172616
NUDT6	3.82e-07	0.00724779
PGAM1	7.59e-08	0.00144006
ESCO2	1.05e-07	0.00199526
ETFDH	9.35e-09	0.000177334
GPHN	6.57e-11	1.25e-06
SPATA5L1	4.31e-11	8.18e-07
RRM2	1.11e-11	2.11e-07
MRM3	1.56e-08	0.000296184
ATPAF2	3.42e-12	6.49e-08
ZNF57	1.7e-11	3.22e-07
THOP1	1.64e-19	3.12e-15
MOB3A	4.88e-13	9.26e-09
CCL11	5.14e-10	9.74e-06
CXCR6	7.52e-17	1.43e-12
CLEC12A	1.34e-07	0.00253962
SUCLG2	1.46e-07	0.00276269
STARD5	4.02e-10	7.62e-06
CTSW	2.73e-07	0.00517554
THEMIS	4.85e-08	0.00092001
FUT10	1.17e-09	2.21e-05
LRRC20	1.67e-09	3.17e-05
CFL1	1.81e-06	0.0343456
RAB37	2.9e-09	5.5e-05
CES3	3.27e-08	0.000619899
CES2	2.66e-12	5.05e-08
PDP2	8.49e-13	1.61e-08
MYEOV	1.39e-10	2.64e-06
DCAKD	1.75e-07	0.00332714
COQ2	2.53e-06	0.0480202
MRPL57	2.35e-12	4.46e-08
RAPH1	5.22e-10	9.89e-06
LIPM	8.06e-10	1.53e-05
GMPPB	3.61e-07	0.00684088
NMNAT1	4.69e-07	0.00888844
CD7	3.34e-09	6.34e-05
EIF1	4.6e-07	0.00872837
TIGD3	1.5e-09	2.84e-05
DPY19L1	1.89e-06	0.0358369
SLC25A30	1.81e-06	0.0343793
CTU2	4.4e-11	8.34e-07
PRPF8	2.02e-09	3.83e-05
DDX23	4.36e-08	0.000825912
RIN1	3.59e-10	6.8e-06
PDE12	2.87e-12	5.45e-08
RAB1B	9.8e-09	0.000185783
GPR171	2.33e-10	4.41e-06
MED16	2.47e-09	4.69e-05
FOSL1	2.49e-06	0.0472313
TTLL11	6.49e-08	0.00123065
SFN	6.07e-08	0.00115125
CTDNEP1	4.07e-10	7.73e-06
ARL4D	2.61e-08	0.000494464
ZNF683	2.3e-10	4.36e-06
SLC35A4	2.57e-10	4.88e-06
BNIP3	2.51e-11	4.75e-07
B3GNT4	3.98e-10	7.56e-06
CRLF3	6.04e-07	0.0114617
RNPEP	2.72e-12	5.17e-08
ZNF575	4.67e-09	8.86e-05
LMNB2	2.11e-14	4e-10
FOXL1	6.35e-11	1.2e-06
FOXC2	5.87e-11	1.11e-06
ACSF3	6.03e-07	0.0114378
IRX5	1.8e-07	0.00341746
WSB2	3.07e-11	5.81e-07
GRIN1	3.3e-16	6.25e-12
TYMS	8.4e-08	0.0015934
SHMT1	2.15e-07	0.0040842
DPP7	8.34e-10	1.58e-05
TALDO1	9.93e-07	0.0188234
RIMKLA	4.53e-09	8.59e-05
TOP3A	1.32e-16	2.51e-12
PPFIA3	2.71e-07	0.00514178
C18orf32	2.06e-10	3.9e-06
ZNF491	1.14e-06	0.0216234
HASPIN	1.02e-11	1.94e-07
FLII	1.25e-06	0.0236206
MAMDC4	3.44e-09	6.52e-05
ZC3H12D	3.25e-09	6.16e-05
NT5DC1	8.99e-07	0.0170479
FAM219B	7.65e-07	0.0144982
CPNE7	9.64e-09	0.0001828
MPI	3.94e-10	7.47e-06
ZBTB7A	8.85e-10	1.68e-05
EXOC3L1	5.85e-09	0.000110974
LBX2	3.95e-09	7.49e-05
PLD6	1.14e-07	0.00215618
PCED1B	2.27e-16	4.31e-12
AKAP5	3.82e-13	7.25e-09
CITED4	8.03e-09	0.000152191
TSHZ1	7.76e-10	1.47e-05
ZADH2	2.1e-12	3.99e-08
TMEM150B	7.33e-10	1.39e-05
ZNF816	7.54e-08	0.0014296
PLD5	1.21e-07	0.00229383
CCDC43	5.08e-07	0.00963689
HARBI1	2.58e-06	0.0489375
C11orf71	1.22e-07	0.00231922
ARHGAP45	1.08e-12	2.05e-08
BHLHA15	1.47e-06	0.0279499
PRF1	5.88e-12	1.12e-07
OR51E1	6.8e-11	1.29e-06
HOXC9	2.3e-07	0.00436512
HOXC10	1.87e-09	3.54e-05
BHLHE22	1.26e-06	0.0238591
LRRC57	1.09e-08	0.000205949
AEN	5.04e-13	9.55e-09
TRAPPC5	9.59e-07	0.0181781
EHMT1	9.87e-10	1.87e-05
CCL13	1.39e-08	0.000264287
MEX3D	6.21e-18	1.18e-13
PHLDA2	2.05e-11	3.89e-07
ODF3L2	3.52e-09	6.67e-05
TIGIT	5.35e-20	1.01e-15
GINS3	2.35e-17	4.45e-13
NOP10	2.45e-12	4.65e-08
MRPL41	4.65e-09	8.81e-05
P2RY8	6.3e-10	1.2e-05
GLTPD2	6.83e-11	1.29e-06
CLN8	1.81e-08	0.000344105
TSKU	2.6e-06	0.0492457
ANXA2	2.15e-15	4.09e-11
ALG12	6.34e-07	0.0120152
LCK	8.63e-10	1.64e-05
AP2A2	5.38e-10	1.02e-05
SMDT1	8.97e-07	0.0170119
CCDC125	1.03e-06	0.019564
KLRC4	1.63e-06	0.0309309
MRPL54	7.64e-11	1.45e-06
CCR4	1.35e-09	2.56e-05
SH2D1A	5.63e-14	1.07e-09
ACTG1	3.19e-07	0.00603989
CRELD2	8.49e-12	1.61e-07
PGP	9.44e-07	0.0178966
C22orf46	4.22e-07	0.00799312
CCR10	2.44e-12	4.62e-08
GAST	3.34e-07	0.00634251
BEX5	1.3e-09	2.46e-05
CDCA2	9.94e-07	0.0188514
LRRC26	5.97e-12	1.13e-07
NDUFA6	3.46e-17	6.55e-13
BRI3BP	1.38e-15	2.62e-11
CIB1	1.89e-10	3.58e-06
RPS27L	2.17e-14	4.12e-10
MANEAL	1.07e-06	0.0203013
GP1BA	1.13e-13	2.14e-09
GAS2L1	1.43e-06	0.027117
RAD51D	2.95e-12	5.6e-08
MAPK11	1.2e-14	2.27e-10
LMNTD2	2.18e-12	4.14e-08
MRPL40	2.82e-07	0.00534723
SNAI3	4.9e-11	9.29e-07
TMEM210	2.66e-13	5.04e-09
C16orf54	4.18e-08	0.000792742
PIP5K1C	2.53e-09	4.79e-05
SAPCD2	2.54e-17	4.81e-13
BTLA	1.24e-07	0.00236
ANKRD37	1.36e-10	2.57e-06
INSIG1	3.1e-12	5.88e-08
SMYD4	2.66e-12	5.04e-08
FOXD2	6.21e-11	1.18e-06
FSCN2	6.91e-08	0.00131081
CXCR3	1.24e-12	2.35e-08
ZNF395	4.83e-07	0.00915551
CHP1	2.66e-09	5.05e-05
VMAC	3.19e-08	0.000604334
FANCA	4.41e-10	8.37e-06
SOWAHD	4.31e-09	8.17e-05
TMEM220	3.53e-13	6.7e-09
TTC24	1.93e-17	3.66e-13
RTP5	2.77e-09	5.25e-05
MAPK12	2.19e-13	4.16e-09
FAM166A	7.37e-08	0.00139787
HYKK	4.71e-07	0.00892498
HES4	3.94e-07	0.00747141
CENPP	2.41e-06	0.0456127
PDCD1	5.5e-12	1.04e-07
CERKL	2.34e-07	0.00443612
HMX3	4.7e-07	0.00890979
HMX2	4.47e-13	8.48e-09
CALHM6	2.15e-07	0.00407368
SLX4	5.18e-08	0.000981528
FAM120AOS	5.13e-13	9.73e-09
C9orf152	5.23e-08	0.000991325
NELFB	1.36e-07	0.00258163
KIR2DL4	3.91e-12	7.41e-08
SF3B3	4.88e-07	0.00924652
C15orf61	2.58e-07	0.00489788
NUGGC	5.85e-10	1.11e-05
RRP7A	1.57e-06	0.0296811
NCR1	2.66e-10	5.05e-06
ZNF79	9.07e-11	1.72e-06
MFSD14C	3.7e-13	7.02e-09
LONP1	4.81e-20	9.11e-16
PRTN3	1.94e-06	0.0368013
XRCC6	6.51e-12	1.24e-07
BORCS6	2.75e-10	5.21e-06
PLXNB2	9.07e-09	0.0001719
RABL6	1.63e-09	3.09e-05
CYSRT1	1.77e-08	0.000335154
IL27	2.68e-09	5.09e-05
UAP1L1	9.54e-18	1.81e-13
SHPK	1.47e-10	2.79e-06
SPN	3.4e-08	0.000645111
GZMM	3.65e-09	6.91e-05
PDCD1LG2	5.04e-09	9.56e-05
S100A10	1.29e-06	0.0244529
CFD	1.96e-15	3.72e-11
MYO1C	2.38e-15	4.52e-11
KIF13B	1.03e-11	1.95e-07
ADH5	3.68e-14	6.98e-10
HES5	9.44e-12	1.79e-07
ERO1A	5.16e-12	9.79e-08
ADH4	1.84e-07	0.00348828
HMGN5	5.92e-07	0.0112192
SVIP	9.38e-10	1.78e-05
WWP2	1.72e-07	0.00326784
KCNRG	9.36e-09	0.000177415
ANKRD13B	1.48e-06	0.0280717
F5	8.35e-07	0.0158361
GRIN3A	4.95e-10	9.4e-06
CD247	1.25e-11	2.36e-07
CD3E	2.64e-11	5e-07
FICD	3.98e-10	7.54e-06
R3HDM4	1.43e-11	2.71e-07
RUNDC1	7.56e-08	0.0014344
SFMBT2	1.05e-06	0.0198814
SREBF2	1.54e-10	2.91e-06
SPOUT1	1.38e-07	0.00262549
APRT	7.61e-07	0.0144284
NAGA	1.35e-10	2.57e-06
CAPN8	4.59e-09	8.71e-05
TATDN3	1.33e-07	0.00251372
GLYATL3	3.85e-08	0.000730228
NXPE2	3.6e-07	0.00682816
LY6G5C	5.67e-12	1.08e-07
LILRB3	3.12e-07	0.0059242
IGFL2	1.98e-10	3.75e-06
E2F4	1.07e-06	0.0203514
TMSB4X	2.42e-10	4.59e-06
CDPF1	9.66e-11	1.83e-06
ARRDC5	2.31e-09	4.38e-05
ONECUT3	5.68e-19	1.08e-14
CCDC183	1.82e-08	0.000345177
COG8	7.06e-07	0.0133958
ARHGAP19	2.42e-06	0.045983
TTLL13P	5.52e-08	0.00104651
VDAC1	4.41e-08	0.000836648
NCKIPSD	9.2e-07	0.0174423
ZNF888	1.61e-09	3.04e-05
KLRK1	2.85e-08	0.000540414
GANC	4.68e-13	8.87e-09
MRPL23	5.11e-07	0.00968091
PRCD	1.62e-12	3.07e-08
PPME1	1.23e-09	2.34e-05
B3GNT10	2.25e-10	4.27e-06
ZBED1	1.39e-07	0.00264227
ZSWIM7	2.7e-18	5.12e-14
CKLF	1.14e-06	0.021593
CELA3B	3.52e-08	0.000667856
RNASEK	2.25e-08	0.000426239
C6orf226	3.85e-12	7.3e-08
C19orf73	9.81e-16	1.86e-11
PLEKHM1	7.36e-09	0.000139616
MKRN2OS	3.59e-11	6.81e-07
LTA	6.25e-09	0.000118578
SCAMP4	3.61e-08	0.000684191
DHFR	5.57e-07	0.0105613
HSBP1	5.44e-07	0.0103124
AJM1	9.47e-15	1.8e-10
TMEM238	1.75e-06	0.0331088
TNFSF12	4.67e-07	0.00885261
TNFRSF13B	2.59e-08	0.000491273
PLCXD2	6.73e-08	0.00127564
PDXP	3.89e-08	0.000736835
MTFP1	2.51e-06	0.0475428
ARFGAP3	2.03e-07	0.00384216
C22orf39	3.73e-11	7.07e-07
ARPIN	1.15e-06	0.0218927
DECR2	1.27e-06	0.0241579
LEFTY1	2.44e-07	0.00463109
JMJD7	3.91e-07	0.00741475
TMEM141	2.89e-08	0.000547983
PGAM5	7.71e-10	1.46e-05
SMIM31	1.78e-12	3.38e-08
EXOC1L	1.39e-06	0.026428
HOXA10	6.57e-12	1.25e-07
EIF5AL1	1.58e-10	3e-06
IGLL5	5.53e-10	1.05e-05
SLC22A18AS	1.48e-08	0.000280043
ANKHD1-EIF4EBP3	1.11e-06	0.021064
FDXACB1	1.51e-09	2.86e-05
KLRC4-KLRK1	8.22e-08	0.00155892
HMBS	2.35e-06	0.0445201
P2RX5-TAX1BP3	1.02e-06	0.0193965
SYNJ2BP-COX16	1.73e-07	0.00327564
POC1B-GALNT4	1.8e-12	3.41e-08
TGFBR3L	5.04e-08	0.000955746
C16orf95	1.47e-14	2.78e-10
BAHCC1	5.84e-10	1.11e-05
RASSF5	1.73e-06	0.0328441
SLC6A14	8.2e-08	0.00155547
TAF15	4.07e-07	0.0077178
CCL5	6.23e-11	1.18e-06
CYFIP1	3.53e-10	6.69e-06
TAF9	6.95e-18	1.32e-13
PANO1	5.36e-11	1.02e-06
NUDT18	1e-14	1.9e-10
CCL4	8.87e-14	1.68e-09
TUBGCP5	1.12e-09	2.12e-05
UHRF1	1.66e-14	3.14e-10
CCL3	2.11e-08	0.000399641
SENP3-EIF4A1	1.07e-07	0.00203698
MYO19	2.12e-08	0.000402535
TSTD3	4.41e-13	8.37e-09

## Sheet: Other_up-regulated genes
	pvalue	p.adj
TSPAN6	2.15e-07	0.00408244
AOC1	2.03e-07	0.00385045
CASP10	7.55e-09	0.000143253
NDUFAF7	5.79e-07	0.0109843
RBM6	2.09e-06	0.0396003
SLC22A16	1.01e-06	0.0191363
PRSS21	1.75e-08	0.000331251
GAS7	1.73e-06	0.0327875
TEAD3	1.64e-08	0.000310615
FUZ	7.02e-13	1.33e-08
HIVEP2	9.43e-07	0.0178885
AKAP8L	6.95e-09	0.000131873
CEP68	2.76e-07	0.00523501
MAP4K3	5.91e-08	0.00112058
GABRA3	7.63e-11	1.45e-06
CD22	8.66e-07	0.0164199
RUFY3	1.08e-09	2.05e-05
SYT13	1.41e-06	0.026807
MRE11	1.47e-07	0.00278673
NRXN3	1.43e-11	2.72e-07
RTF2	3.66e-09	6.94e-05
SLC45A4	2.09e-06	0.0397231
RB1CC1	7.2e-13	1.37e-08
RNF19A	3.17e-07	0.00600396
SOX30	8.52e-08	0.00161532
INPP4A	1.99e-08	0.000377884
LSG1	2.42e-10	4.59e-06
TRIT1	6.43e-07	0.0121937
WDR37	2.57e-06	0.0488257
ANO2	1e-08	0.000189702
COL9A2	4.36e-10	8.27e-06
LAMC3	5.82e-09	0.000110454
TTC17	2.53e-07	0.00479489
FSTL4	1.91e-09	3.62e-05
KIF1B	1.95e-06	0.0369591
GALC	1.04e-07	0.00196661
MCOLN3	2.71e-08	0.00051313
TARBP1	1.58e-07	0.00299941
PTPRU	1.53e-07	0.00290938
TNK2	9.14e-07	0.017325
DGAT2	5.97e-07	0.0113224
ELMO2	5.94e-07	0.0112703
EML1	1.26e-07	0.00239373
NEO1	3.53e-11	6.69e-07
TRO	1.68e-23	3.19e-19
ATP2B3	9.21e-13	1.75e-08
SDK2	1.76e-08	0.000333267
TGFBR3	1.92e-07	0.00363357
ZXDC	2.72e-08	0.000516319
FRMPD1	1.04e-08	0.00019781
TRPM5	2.3e-06	0.0436303
CYBRD1	1.84e-06	0.0348396
SLC6A15	2.21e-11	4.19e-07
RPS6KA6	3.75e-08	0.00071067
CLCN4	2.25e-08	0.000426872
PPP2R3A	2.63e-09	4.99e-05
MAP3K13	4.5e-21	8.54e-17
TEAD2	1.58e-07	0.00300466
ADD2	1.93e-08	0.000366083
CACNG4	9.9e-12	1.88e-07
DLG1	8.07e-08	0.00152953
MLH1	2.5e-94	4.74e-90
SPAG6	1.03e-09	1.96e-05
SMC1B	2.06e-09	3.9e-05
CBFA2T2	7.1e-09	0.000134597
SLC35C2	1.78e-08	0.000338087
C1QTNF3	4.3e-08	0.000814855
RRAGB	4.1e-07	0.00777161
BCORL1	5.15e-07	0.00976749
MYNN	1.11e-07	0.00210019
MECOM	1.94e-06	0.0366976
WNT11	9.46e-07	0.0179481
PGS1	6.96e-09	0.000131976
ASAP3	3.63e-08	0.00068927
SLC23A2	3.14e-09	5.96e-05
ZNF302	1.84e-12	3.48e-08
DNAJB11	7.09e-09	0.000134491
SLC7A8	7.27e-12	1.38e-07
SLC22A17	2.92e-07	0.00554133
PTGS1	1.37e-06	0.0259063
CRTAC1	1.23e-18	2.34e-14
PRTFDC1	1.38e-11	2.62e-07
SLC7A4	5.53e-08	0.00104828
NEFH	3.85e-10	7.3e-06
SYNGR1	5.04e-07	0.00955078
PAPLN	1.25e-14	2.36e-10
NFATC4	6.09e-08	0.00115449
PLTP	7.29e-16	1.38e-11
NINL	9.72e-07	0.0184413
IFT52	1.75e-07	0.00331528
PABPC1L	3.49e-07	0.00661459
SALL4	1.14e-06	0.021599
ADNP	9.35e-09	0.000177287
DOK5	1.25e-07	0.00237057
BMP7	4.13e-11	7.83e-07
RAE1	3.55e-08	0.00067382
NELFCD	6.86e-08	0.00130168
RSPO4	3.6e-16	6.84e-12
PROKR2	2.62e-07	0.00496133
TM9SF4	9.34e-10	1.77e-05
CDK5RAP1	1.3e-06	0.0246124
RPRD1B	2.03e-07	0.00385837
CELF4	3.22e-20	6.1e-16
GPR143	1.29e-06	0.0244391
KCND1	8.35e-07	0.0158351
PCSK1N	5.78e-15	1.1e-10
VGLL1	7.32e-08	0.00138729
GABRE	9.53e-14	1.81e-09
MAGED2	9.47e-10	1.8e-05
BEX4	1.91e-24	3.62e-20
SYT17	5.95e-08	0.00112919
AP3B2	5.41e-08	0.00102511
BMF	4.63e-08	0.000878251
IKBKB	5.21e-07	0.00987698
URI1	5.52e-10	1.05e-05
DYRK1B	1.1e-09	2.08e-05
PLD3	1.77e-08	0.000335596
MAG	2.49e-11	4.72e-07
GRIK5	2.21e-06	0.0418867
RNF32	3.05e-10	5.78e-06
ANKRD7	1.71e-12	3.23e-08
CPVL	6.63e-09	0.000125745
NPTX2	1.36e-07	0.00257015
MEST	2.63e-07	0.00498726
GCK	1.65e-08	0.000312634
KCNT1	1.83e-07	0.00347152
PALD1	1.39e-06	0.0263969
MAP3K8	4.07e-09	7.72e-05
CCNY	2.25e-06	0.0426443
ZMIZ1	1.18e-06	0.0223647
RGS9	5.42e-08	0.00102778
RECQL5	2.22e-07	0.00421648
LGALS3BP	1.64e-10	3.1e-06
FAM20A	2.21e-07	0.00419234
FOXN1	2.07e-06	0.0393289
MAPK10	1.07e-06	0.020339
KLHL5	2.62e-09	4.97e-05
PPARGC1A	2.37e-11	4.5e-07
DDX25	2.48e-09	4.7e-05
ARHGEF17	1.73e-09	3.28e-05
CEP164	3.17e-12	6.02e-08
PTPN5	2.92e-08	0.000553974
PRMT8	1.5e-06	0.0284102
RAB5B	3.71e-07	0.00703257
CHD4	1.22e-06	0.023147
ING4	3.43e-09	6.5e-05
STK38	1.64e-06	0.0310761
PHACTR1	1.5e-06	0.0283593
GLP1R	1.36e-06	0.0258609
SAYSD1	1.45e-06	0.0274574
COL9A1	7.78e-07	0.0147617
EYA4	6.15e-15	1.17e-10
BRD8	9.17e-07	0.017386
DROSHA	4.32e-09	8.2e-05
CDH6	1.67e-07	0.0031728
LIFR	1.63e-06	0.0308369
EHHADH	4.74e-12	9e-08
BCL6	1.29e-08	0.000244429
CLDN16	1.63e-06	0.0309536
ARMC8	2.04e-07	0.00386192
RBP1	1.78e-07	0.00337863
FGF12	5.21e-09	9.89e-05
USP4	6.91e-07	0.0131055
FXR1	9.85e-10	1.87e-05
IFT57	2.57e-08	0.000487279
ACVR2B	3.27e-07	0.0061947
WDR48	2.59e-06	0.0491901
ABCC5	2.67e-14	5.05e-10
EIF1B	9.88e-07	0.0187433
KLHL24	1.35e-16	2.56e-12
KANSL3	8.48e-09	0.000160727
SLC35F5	9.61e-09	0.000182155
GTF3C2	1.6e-07	0.00304019
CLIP4	1.49e-08	0.000282278
IGFBP2	1.82e-07	0.00346008
WNT6	1.15e-10	2.19e-06
IL1RL2	3.36e-09	6.38e-05
TAF1B	4.19e-10	7.94e-06
SLC25A12	6.8e-07	0.0128874
SOS1	2.25e-09	4.27e-05
THADA	7.94e-20	1.51e-15
EPHA4	3.09e-09	5.86e-05
PARD3B	2.87e-07	0.00543855
AMPD2	2.47e-08	0.000469247
DLGAP3	1.51e-06	0.0285481
GON4L	4.19e-08	0.000794916
MYCL	3.28e-14	6.22e-10
ADGRL2	1.06e-16	2.01e-12
MFAP2	1.76e-08	0.000333886
CCDC181	1.46e-06	0.0276752
PTBP2	6.21e-08	0.00117678
CHRNB4	6.69e-07	0.0126921
RNF146	7.84e-11	1.49e-06
TGIF2	9.49e-11	1.8e-06
KLF12	7.16e-07	0.0135759
LDAH	1.44e-17	2.73e-13
WDR35	2.91e-08	0.000551889
GTF3C3	2.09e-06	0.0396615
SENP5	1.58e-12	2.99e-08
DCAF4	6.91e-07	0.013107
IRF2BPL	8.73e-09	0.000165592
PPP4R4	1.86e-08	0.000353441
RHOQ	2.08e-11	3.95e-07
SUPT7L	2.97e-12	5.63e-08
DNMT3A	5.33e-10	1.01e-05
ATL2	5.45e-07	0.0103435
YPEL5	2.14e-09	4.06e-05
YIPF4	3.77e-11	7.16e-07
SFRP5	2.02e-08	0.000382349
HOXB8	2.43e-07	0.00461729
HOXB3	2.95e-10	5.6e-06
IQSEC3	8.94e-08	0.00169499
TNFSF10	2.98e-12	5.65e-08
PIK3CA	4.1e-07	0.00778257
CPXM2	2.59e-11	4.92e-07
NPY	1.56e-09	2.95e-05
CNTFR	7.2e-11	1.36e-06
NFE2	9.62e-17	1.82e-12
CTCFL	2.03e-10	3.84e-06
PREX1	2.31e-09	4.37e-05
KCNS1	1.94e-09	3.68e-05
SLC12A5	1.36e-06	0.0258255
SRSF6	8.24e-07	0.0156315
STX16	1.71e-08	0.000323999
RNF114	2.4e-06	0.0454837
DDX27	1.6e-15	3.03e-11
PCK1	5.39e-08	0.00102118
MAGEA10	3.4e-08	0.000645294
PAIP2B	5.11e-10	9.69e-06
HIF3A	9.89e-21	1.88e-16
SIRT5	4.57e-16	8.66e-12
EFNB2	1.39e-14	2.64e-10
CHCHD5	1.48e-13	2.81e-09
PANK2	1.95e-07	0.0036893
NAPB	8.75e-07	0.0165871
ZNF133	3e-09	5.68e-05
PLAGL2	2.11e-10	4e-06
IFI6	4.53e-08	0.000859281
ARMCX1	2.02e-14	3.82e-10
DYRK2	1.18e-10	2.24e-06
RASL11B	6.12e-07	0.0115979
MGAT3	1.13e-09	2.15e-05
MBD4	1.33e-12	2.53e-08
MYOD1	1.96e-06	0.0372107
ATP1B2	4.77e-09	9.05e-05
KLK8	6.28e-14	1.19e-09
CDKN1C	6.4e-07	0.0121408
GALNT8	1.97e-06	0.037347
LRCH2	5.34e-08	0.0010117
CACNG6	6.09e-12	1.15e-07
SULT4A1	1.67e-08	0.000316795
ZBTB46	3.47e-08	0.000658959
OSBPL2	4.26e-11	8.07e-07
ASS1	5.44e-08	0.00103246
SLC7A10	6.54e-10	1.24e-05
RGN	2.29e-11	4.33e-07
RBM39	1.98e-06	0.0374972
GGT7	1.75e-09	3.31e-05
RAI2	8.29e-08	0.00157213
LRRC9	3.25e-08	0.000616756
ZSWIM4	2.64e-11	5.01e-07
SLC6A11	1.01e-14	1.91e-10
IQCA1	1.31e-19	2.48e-15
LANCL2	1.07e-07	0.00202129
RGS22	3.53e-19	6.7e-15
PCED1A	1.89e-06	0.0357914
RIN2	3.26e-07	0.00617332
KHDC4	1.95e-06	0.0369398
DCAF8	4.3e-08	0.000816215
SYT11	7.54e-12	1.43e-07
TESMIN	9.71e-11	1.84e-06
RBM38	2.04e-14	3.87e-10
OSER1	2.32e-06	0.0440755
DMGDH	6.19e-07	0.011731
BHMT2	4.31e-09	8.17e-05
DSTYK	4.84e-08	0.000918315
TMCC2	2.8e-07	0.00530839
BEX2	2.36e-18	4.47e-14
EPHB2	3.23e-12	6.13e-08
PDE6B	9.69e-12	1.84e-07
PDZD2	6.28e-08	0.00119158
SEC14L4	2.08e-11	3.95e-07
LRRIQ1	8.14e-10	1.54e-05
DYDC2	3e-13	5.69e-09
TMTC1	8.21e-07	0.0155671
E2F5	9.91e-07	0.0187886
UNC79	4.1e-08	0.000778191
CHL1	2.41e-17	4.56e-13
DTNA	1.42e-10	2.69e-06
DZIP1	5.85e-08	0.00110938
ANKRD6	1.82e-07	0.00345823
GDF11	4.72e-07	0.00895527
ACVR1B	6.1e-15	1.16e-10
SLC19A3	7.88e-08	0.00149504
WNT10A	8.92e-08	0.00169219
EPC2	4.82e-07	0.00914475
ARHGEF4	2.37e-10	4.5e-06
USP44	9.01e-12	1.71e-07
SCRN1	1.97e-06	0.0374329
RTP4	3.73e-07	0.00707828
SKIL	9.9e-08	0.00187758
HS6ST1	1.48e-07	0.00279998
STXBP1	1.35e-06	0.0256211
ENPP2	3.76e-09	7.12e-05
IGFBPL1	1.13e-06	0.0214927
FOXP4	2.18e-09	4.13e-05
KLC4	5.14e-11	9.74e-07
CMTR1	2.37e-11	4.49e-07
TUBB2B	3.23e-07	0.00612903
POU2F3	1e-13	1.9e-09
SEMA6D	2.88e-13	5.46e-09
IFT172	5.92e-10	1.12e-05
LOXL4	3.09e-07	0.00586724
CUZD1	1.88e-09	3.57e-05
ADAMTS14	2.66e-08	0.000504798
HCN4	6.41e-08	0.00121606
PCDH10	1.08e-06	0.0205193
CDKL2	9.6e-07	0.018205
ERP27	5.53e-16	1.05e-11
MAP3K12	3.02e-07	0.00573098
SSTR1	1.1e-07	0.00208986
NOVA1	5.24e-08	0.000992797
IGF1R	8.14e-10	1.54e-05
KSR1	5.19e-07	0.00984073
ARSG	5.46e-11	1.04e-06
SLC13A5	2.57e-15	4.86e-11
RNF165	2.32e-06	0.0440419
CACNA1A	3.53e-09	6.7e-05
HUNK	2.14e-06	0.0405859
CACNG8	1.04e-06	0.0196856
FBN3	2.05e-07	0.00388687
RERE	2.37e-09	4.49e-05
WDTC1	1.63e-08	0.000309645
IGSF3	4.32e-11	8.19e-07
TMCO1	1.85e-14	3.5e-10
NECTIN4	1.2e-06	0.0227976
CRABP2	3.8e-11	7.21e-07
SETDB1	7.3e-07	0.0138392
POGZ	8.92e-07	0.0169124
SYT14	9.63e-10	1.83e-05
SUSD4	4.6e-11	8.72e-07
INTS3	1.89e-06	0.0357524
DEGS1	8.64e-07	0.0163923
MBOAT2	1.79e-08	0.000339253
ETNK2	2.11e-07	0.00399623
MEIS1	5.03e-09	9.53e-05
GALNT13	1.55e-06	0.0293296
TMEFF2	1.84e-07	0.0034918
SPAG16	3.62e-13	6.86e-09
SUMF1	3.71e-09	7.04e-05
ACKR3	1.38e-08	0.000261478
ZNF660	6.84e-11	1.3e-06
TMEM108	1.06e-13	2.02e-09
TRPC1	1.39e-06	0.0263839
MUC4	4.61e-08	0.00087481
LIX1	1.13e-15	2.13e-11
ZNF300	2.04e-29	3.87e-25
FAM50B	2.89e-11	5.48e-07
MYLK4	6.48e-07	0.0122892
GFOD1	1.29e-14	2.45e-10
CDKAL1	1.46e-06	0.0277773
RNF44	7.22e-09	0.000136941
HMGCLL1	1e-08	0.000189607
AIG1	3.95e-11	7.49e-07
SDK1	1.19e-09	2.26e-05
SSC4D	1.12e-06	0.0212705
ZNF157	5.78e-17	1.1e-12
KRBOX4	1.01e-06	0.0191144
OGT	4.73e-07	0.0089638
SNX12	6.79e-07	0.0128794
HTR2C	3.14e-09	5.96e-05
IGSF1	1.41e-18	2.68e-14
ARHGAP36	2.3e-08	0.000436147
MAGEA4	3.88e-08	0.000735759
ADHFE1	3.83e-17	7.26e-13
CDKN2B	2.18e-17	4.13e-13
CDKN2A	4.38e-21	8.3e-17
CRB2	1.96e-09	3.72e-05
FAM171A1	3.56e-12	6.76e-08
LRRC4C	1.52e-13	2.88e-09
TENM4	6.63e-12	1.26e-07
CAPN5	4.89e-07	0.00927371
DRD2	2.14e-07	0.00404937
CDH22	1.14e-06	0.0216414
CNKSR2	9.59e-10	1.82e-05
ARID5B	3.15e-08	0.000597423
LYPD6B	2.65e-08	0.00050236
WDR17	8.74e-07	0.0165755
GPR158	2.75e-13	5.22e-09
THRB	7.77e-17	1.47e-12
SERP2	1.02e-08	0.000193263
CACUL1	5.82e-09	0.00011041
ASTN1	3.86e-07	0.00731084
TMEM163	2.11e-09	4.01e-05
JMY	1.6e-08	0.000302633
NMT2	6.22e-09	0.000117931
CCDC50	3.96e-07	0.00750658
PFKM	4.11e-08	0.000780318
SLC30A6	1.38e-08	0.000262017
ZNF117	1.46e-06	0.0277219
RBMS1	6.28e-08	0.00119002
SLC25A27	6.31e-10	1.2e-05
FBXL2	9.53e-08	0.00180738
UCHL1	2.71e-10	5.13e-06
GPR26	4.89e-10	9.27e-06
CHODL	1.5e-09	2.84e-05
SLFN13	4.01e-22	7.6e-18
WNT7A	4.01e-09	7.61e-05
FGD5	1.11e-07	0.00210547
XAGE2	5.71e-14	1.08e-09
C2CD6	2.13e-11	4.03e-07
SPAG17	1.48e-15	2.8e-11
RRAGA	4.96e-11	9.4e-07
DPY19L4	2.63e-06	0.0498102
TSPAN7	6.4e-10	1.21e-05
TIAM1	3.11e-16	5.9e-12
KAT6B	1.24e-06	0.0234815
NSMCE2	7.11e-07	0.0134846
VPS8	6.19e-14	1.17e-09
MPV17L	1.28e-18	2.43e-14
SST	1.21e-10	2.29e-06
SSBP3	2.4e-10	4.55e-06
SUSD3	3.48e-08	0.000660616
HYDIN	7.61e-13	1.44e-08
CACNA2D3	5.06e-12	9.6e-08
SVOPL	2.14e-08	0.000404911
WIPI2	2.21e-06	0.041878
ESYT3	4.66e-09	8.84e-05
SHROOM4	1.13e-07	0.00213545
NRG2	3.9e-07	0.00739469
SPATA2	1.98e-06	0.0375411
EDA	1.93e-08	0.000365586
VWA5B1	4.33e-09	8.2e-05
CACHD1	7.26e-11	1.38e-06
TEPP	8e-08	0.00151673
NPR2	1.34e-06	0.0254262
CPAMD8	2.3e-12	4.35e-08
NR2F6	2.51e-06	0.0475254
KALRN	3.35e-11	6.35e-07
LY6K	2.18e-07	0.00413163
ABCF3	4.64e-09	8.81e-05
PCYT1A	5.9e-09	0.000111823
ZNF75A	2.88e-07	0.00546756
ADCY9	1.29e-07	0.00244838
JAK1	2.31e-10	4.37e-06
ALPL	3.43e-07	0.00650006
HENMT1	3.78e-29	7.18e-25
KCNT2	9.85e-09	0.000186728
TRIM58	5e-09	9.47e-05
SLC9C2	2.34e-13	4.44e-09
SNED1	2.94e-07	0.00557617
PPP1R21	5e-09	9.48e-05
TRIM17	1.51e-12	2.86e-08
ANKRD30BL	3.62e-10	6.86e-06
CDC42EP3	6.37e-07	0.0120825
DHX57	1.52e-13	2.89e-09
POGLUT1	1.42e-10	2.69e-06
SLC22A15	1.54e-06	0.0292347
NUAK2	3.09e-07	0.00586785
PRKCI	1.2e-08	0.000227394
EIF5A2	3.62e-07	0.00685857
NEPRO	2.29e-09	4.34e-05
PRICKLE2	2.54e-06	0.0480743
CCNL1	3.35e-08	0.000635295
PTX3	4.46e-17	8.46e-13
C3orf67	6.02e-19	1.14e-14
TTC14	2.36e-06	0.0448352
CCDC158	1.45e-10	2.75e-06
RYK	8.45e-08	0.00160263
YEATS2	6.31e-07	0.011969
TMEM41A	3.68e-12	6.97e-08
SENP2	7.15e-15	1.36e-10
IFT122	6.76e-08	0.00128237
ZDHHC19	6.96e-07	0.0131993
UBXN7	5.8e-07	0.0109942
EXO5	1.34e-07	0.00254158
PRSS12	2.61e-07	0.0049506
NDST3	3.6e-08	0.000682172
ICE1	2.31e-06	0.0437762
NIPBL	2.54e-06	0.0481501
KIF6	5.75e-11	1.09e-06
CA3	6.7e-10	1.27e-05
VIRMA	3.03e-07	0.00574471
TMEM67	2.58e-06	0.0488891
ABCA1	2.31e-06	0.0438825
HGSNAT	8.88e-07	0.0168349
HDX	4.93e-07	0.00935417
DEUP1	5.05e-17	9.57e-13
TMEM63C	1.74e-07	0.00329971
NGB	4.11e-09	7.79e-05
OXGR1	2.51e-10	4.77e-06
BEND7	8.13e-15	1.54e-10
ZNF503	2.56e-07	0.00485841
NDRG2	4.91e-08	0.00093016
C10orf82	1.04e-09	1.98e-05
NELL1	2.59e-07	0.00490928
ADAMTS15	1.37e-10	2.6e-06
ALKBH3	2.37e-21	4.49e-17
SCN3B	4.23e-07	0.00802217
BLCAP	1.93e-13	3.66e-09
ATF7IP2	1.06e-08	0.000200082
LDHC	9.59e-07	0.0181871
SCNN1G	2.32e-06	0.0439852
MS4A15	4.95e-13	9.39e-09
TCP10L2	8.35e-11	1.58e-06
GPRC5B	1.11e-06	0.0211038
KATNAL2	3.32e-10	6.3e-06
NCKAP5L	1.17e-07	0.00222261
ANKRD33	2.83e-07	0.00537047
KLK6	5.6e-07	0.010618
VASN	1.8e-09	3.41e-05
MOBP	1.09e-10	2.06e-06
SCN11A	4.02e-14	7.63e-10
SLC20A2	2.08e-09	3.95e-05
SEMA4C	2.26e-08	0.000429404
ZNF507	4.37e-07	0.00829628
HTR1E	2.44e-07	0.00462142
C2orf68	2.88e-08	0.000546694
TMEM150A	2.4e-06	0.0454706
ZNF608	1.03e-12	1.95e-08
KLK7	7.66e-10	1.45e-05
MECP2	4.29e-07	0.00812607
VXN	3.85e-12	7.3e-08
HSPBAP1	1.05e-07	0.00198629
FAM110B	1.77e-15	3.36e-11
THBS3	1.72e-13	3.27e-09
EFNA1	1.5e-10	2.85e-06
NPR1	5.36e-10	1.02e-05
KCNK9	1.05e-10	1.99e-06
BNC1	1.41e-07	0.00266886
NLGN1	5.38e-08	0.00102002
TPST1	2.23e-06	0.0422776
ZFPM2	1.66e-06	0.0314706
RNF150	1.79e-08	0.000340007
FAXDC2	1.3e-12	2.46e-08
LRRN2	5.1e-12	9.67e-08
DNAJC18	6.82e-10	1.29e-05
RIOX1	1.41e-10	2.67e-06
RALGAPB	1.72e-12	3.27e-08
SDR16C5	6.7e-14	1.27e-09
CYTL1	5.7e-11	1.08e-06
MSANTD4	3.8e-07	0.00721224
TANC2	7.34e-20	1.39e-15
TSNARE1	2.06e-06	0.0391367
FEZ2	2.82e-07	0.00534398
ALK	8.68e-15	1.65e-10
MFN1	1.35e-08	0.000256496
KCNMB3	1.17e-06	0.0222068
PRKCE	1.43e-09	2.71e-05
CHD7	3.06e-07	0.00579344
ASXL1	1.26e-16	2.38e-12
LPAR3	4.05e-11	7.69e-07
ZNF274	1.05e-09	1.99e-05
ATF7IP	8.9e-09	0.000168791
TCEA2	1.51e-08	0.000286768
ANO5	2.98e-14	5.64e-10
LRRC34	7.31e-08	0.00138692
PCDHB1	1.42e-06	0.0269519
FAM90A1	3.23e-08	0.000612575
PRNP	6.81e-07	0.0129164
RAB40A	1.68e-10	3.18e-06
MAB21L4	3.07e-07	0.00581725
WASHC2C	3.95e-07	0.00748097
STOX2	5.89e-10	1.12e-05
PTPRM	1.55e-07	0.00294233
ADGRG2	1.31e-08	0.000248662
HOXB2	8.54e-08	0.00162027
CTSF	1.46e-07	0.00276273
IGDCC3	1.94e-12	3.68e-08
TRAM1L1	4.81e-11	9.12e-07
NR1D2	3.85e-07	0.00730557
BTC	1.01e-06	0.0192346
ZDHHC14	7.16e-07	0.0135711
ATR	6.92e-08	0.00131186
ABO	6.05e-07	0.0114647
CTDSP2	5.78e-08	0.00109689
GAL3ST3	5.82e-09	0.000110336
PTPN2	3.09e-07	0.00586138
ARL10	9.01e-07	0.0170844
GPR156	1.85e-07	0.00350084
PRIMA1	5.09e-08	0.000964771
LRRN1	5.79e-11	1.1e-06
ZNF135	2.15e-16	4.08e-12
SLCO3A1	6.04e-13	1.15e-08
METRNL	1.02e-08	0.000193276
PNMA1	5.54e-11	1.05e-06
MUC20	2.48e-07	0.00470754
ZDHHC13	1.91e-06	0.0361662
TBL1XR1	1.5e-09	2.84e-05
SAMD12	3.58e-10	6.8e-06
SOX12	1.54e-09	2.93e-05
MYOZ1	5.53e-10	1.05e-05
ZNF354C	4.81e-10	9.13e-06
MLF1	1.29e-12	2.45e-08
RNF212	1.87e-10	3.54e-06
EPM2AIP1	4.84e-80	9.17e-76
C10orf53	2.13e-12	4.03e-08
FAM133A	4.75e-08	0.000899815
NSUN7	2.78e-08	0.000527162
VWA1	1.72e-09	3.27e-05
FJX1	1.04e-09	1.98e-05
MKRN3	2.52e-06	0.047783
SLITRK4	1.53e-06	0.0290068
FCER1A	7.57e-07	0.0143457
ABCA13	4.24e-08	0.00080425
R3HDM2	4.08e-07	0.00773476
BBS10	3.31e-08	0.000626742
TDRP	3.46e-14	6.56e-10
DEFB124	3.7e-07	0.00702221
RNF182	6.55e-12	1.24e-07
MB21D2	2.83e-12	5.37e-08
ZFP3	1.66e-20	3.15e-16
ZNF572	1.58e-08	0.000300423
TMEM132C	2.21e-06	0.0418282
PLAG1	6.17e-08	0.00116981
CHST15	5.03e-12	9.54e-08
ZNF716	1.3e-06	0.0246406
LDOC1	1.43e-06	0.0271189
EXT1	1.13e-09	2.15e-05
UBE2E2	2.74e-22	5.2e-18
GABRG3	1.12e-09	2.12e-05
SPACA6	1.6e-06	0.030282
KIAA2012	2.25e-07	0.00427146
RGS6	1.09e-06	0.0207472
HOXB4	4.72e-09	8.94e-05
ZNF662	1.3e-17	2.46e-13
SLC8A1	2.46e-08	0.000466069
FAM43B	9.39e-07	0.0178002
CCBE1	2.06e-07	0.00390671
ZNF623	1.46e-06	0.0275999
MX2	8.85e-17	1.68e-12
COA5	7.19e-07	0.0136424
TRMT12	1.71e-06	0.0324842
EFHC2	1.24e-06	0.023458
MACC1	4.69e-12	8.9e-08
ANKRD45	2.05e-10	3.89e-06
MAATS1	3.5e-09	6.64e-05
PNMA3	7.54e-23	1.43e-18
FAM3B	1.02e-07	0.00193135
SCN5A	6.22e-17	1.18e-12
DNAH2	3.58e-08	0.000679412
KCNJ12	5.37e-07	0.0101917
GPR173	8.28e-17	1.57e-12
OAF	3.53e-07	0.00670312
MROH7	1.37e-06	0.0260434
COLEC10	2.49e-06	0.047272
ACTRT3	1.21e-06	0.0228869
WDR27	1.38e-07	0.00262032
OR56A3	2.71e-09	5.14e-05
FOXO4	3.82e-08	0.000724638
PTP4A3	9.44e-13	1.79e-08
CLDN6	2.82e-12	5.34e-08
RNLS	2.71e-41	5.14e-37
SDR42E1	8.42e-20	1.6e-15
ARMCX2	7.36e-20	1.4e-15
CLCNKB	1.72e-08	0.00032669
MFSD6L	9.92e-07	0.0188033
NRBP2	8.44e-10	1.6e-05
MAGEA11	1.35e-06	0.0256374
NUPR2	6.2e-17	1.17e-12
L3MBTL1	1.11e-08	0.000211054
NTF3	2.26e-08	0.000428045
ZNF829	3.13e-07	0.00594045
IFITM1	1.75e-06	0.033141
KLHDC8B	5.5e-09	0.000104319
IRS2	2.22e-07	0.00420492
LRCH3	6.99e-07	0.0132623
NBPF6	2.29e-07	0.00434266
AGBL4	4.68e-15	8.88e-11
CYP2R1	1.02e-06	0.0193453
CLCNKA	1.24e-09	2.36e-05
CEACAM19	8.48e-08	0.00160732
HPDL	4.89e-09	9.28e-05
EMID1	1.48e-13	2.8e-09
HEATR4	7.19e-08	0.00136314
FNBP1	1.62e-07	0.00308117
BCAM	1.04e-13	1.97e-09
MAGI2	1.08e-06	0.0204141
CYP26C1	4.54e-11	8.6e-07
NHLRC1	1.76e-13	3.35e-09
MAGEH1	1.46e-12	2.76e-08
ERAS	1.36e-06	0.0257665
KBTBD12	3.12e-16	5.92e-12
THSD4	6.49e-13	1.23e-08
DNAH17	5.07e-10	9.62e-06
PALM3	2.67e-07	0.00506555
ZSCAN23	1.51e-07	0.00285536
C11orf95	3.03e-07	0.00574274
OTOG	1.19e-07	0.00226123
COL25A1	2.62e-07	0.00496817
CFAP54	3.36e-07	0.00637746
NANOS1	3.97e-11	7.52e-07
RELN	7.74e-07	0.0146784
ANKRD34B	5.94e-08	0.00112663
ZNF33A	1.56e-10	2.95e-06
KAZN	2.37e-06	0.0449771
ZFP92	2.19e-06	0.0415907
RASSF10	1.75e-06	0.0331518
PTPRT	1.32e-09	2.5e-05
MYT1	1.84e-13	3.49e-09
RYR1	1.26e-08	0.000238655
ZNF471	9.21e-07	0.0174638
ZKSCAN7	2.99e-11	5.67e-07
NBPF4	3.51e-07	0.00665463
ARMCX4	3.18e-11	6.04e-07
WNK3	1.08e-07	0.00204499
ZNF502	2.19e-07	0.00414834
TTC30B	1.33e-09	2.52e-05
ZNF418	3.55e-07	0.00672381
CD47	6.72e-13	1.27e-08
SCN8A	4.03e-08	0.000763377
HCAR1	5.74e-13	1.09e-08
WDR45	1.2e-07	0.00227769
ZNF772	1.94e-14	3.67e-10
ZNF257	2.56e-09	4.85e-05
ADAM32	8.74e-18	1.66e-13
NOL4L	2.42e-20	4.6e-16
SYNGAP1	4e-08	0.000758558
ZNF98	5.92e-14	1.12e-09
TTC30A	3.35e-18	6.36e-14
MEIG1	4.56e-07	0.00864807
NRAP	1.36e-06	0.0257221
HRNR	2.19e-06	0.0415936
ZNF677	6.19e-10	1.17e-05
ZNF311	1e-22	1.9e-18
ZNF667	7.56e-19	1.43e-14
SULT1C4	2.42e-06	0.0458153
ZNF248	1.1e-11	2.09e-07
ZNF251	1.3e-10	2.46e-06
ZNF334	1.82e-14	3.46e-10
UVRAG	4.18e-11	7.93e-07
ZNF568	1.46e-06	0.0276672
TTC37	2.51e-07	0.00476037
TOGARAM1	4.28e-25	8.12e-21
PPP1R14C	8.98e-07	0.0170363
DCAF12L1	9.91e-10	1.88e-05
PCMTD2	5.6e-14	1.06e-09
ZYG11A	5.21e-09	9.89e-05
LIPJ	9.08e-09	0.000172242
FOXO6	1.89e-08	0.000358676
TCEAL5	8.73e-11	1.65e-06
GPRIN2	6.21e-12	1.18e-07
COL11A2	5.48e-07	0.0103982
PBX2	1.4e-08	0.000265195
SMIM5	2.17e-06	0.0411793
BTBD17	6.1e-07	0.0115646
HSPA1A	2.79e-09	5.29e-05
PNMA8B	4.61e-08	0.000874299
PRSS1	2.92e-08	0.000554207
AARD	5.3e-09	0.00010045
SLCO6A1	2.37e-06	0.0448907
CFI	6.75e-10	1.28e-05
TP53TG3D	2.93e-10	5.55e-06
LNP1	9.24e-15	1.75e-10
COLQ	4.87e-09	9.24e-05
FAM24B	1.57e-09	2.98e-05
GSTM2	1.77e-14	3.35e-10
ATF6B	1.53e-11	2.9e-07
CLDN9	8.31e-12	1.58e-07
ZNF726	4.47e-08	0.000847384
CPNE1	1.29e-07	0.00244421
ZNF727	8.18e-08	0.00155121
ATAD3C	4.27e-09	8.1e-05
C2orf16	5.61e-11	1.06e-06
FXYD7	2.04e-06	0.0387366
C1GALT1C1L	1.23e-13	2.33e-09
PRRT4	3.23e-07	0.00612966
ERVMER34-1	5.46e-07	0.0103534
ZNF717	2.91e-20	5.53e-16
ZNF883	1.59e-10	3.02e-06
ZBED9	4.29e-09	8.13e-05
PAGE2	1.17e-06	0.0221206
TCP10L	1.61e-08	0.000305548
RTL5	1.14e-06	0.0216027
STON1	2.19e-06	0.041596
PRAF2	4.37e-08	0.000828502
CFB	6.97e-16	1.32e-11
ZNF512	9.94e-30	1.88e-25
USP51	3.89e-10	7.38e-06
FER1L5	1.19e-09	2.25e-05
TUNAR	1.57e-11	2.98e-07
FAM218A	1.07e-25	2.02e-21
NOX5	5.35e-11	1.01e-06
HOXB7	1.6e-06	0.0302906
XKR7	9.69e-07	0.0183725
SPON1	9.45e-08	0.0017915
ZNF285	2.43e-18	4.6e-14
GABRQ	1.56e-07	0.00295321
ARL14EPL	3.73e-09	7.08e-05
ARHGAP23	3.18e-11	6.02e-07
SRCIN1	1.84e-08	0.000349551
ZNF229	7.59e-12	1.44e-07
